# Supplementary material for: Early Experience Analyzing Dietary Intake Data from the Canadian Community Health Survey—Nutrition Using the National Cancer Institute (NCI) Method
Source: MDPI journal article supplement (doi:10.3390/nu11081908), 2019-08-15
Supplement: s1 [file s1]

---

Flowchart for Estimation of Usual Intakes using the univariate NCI method

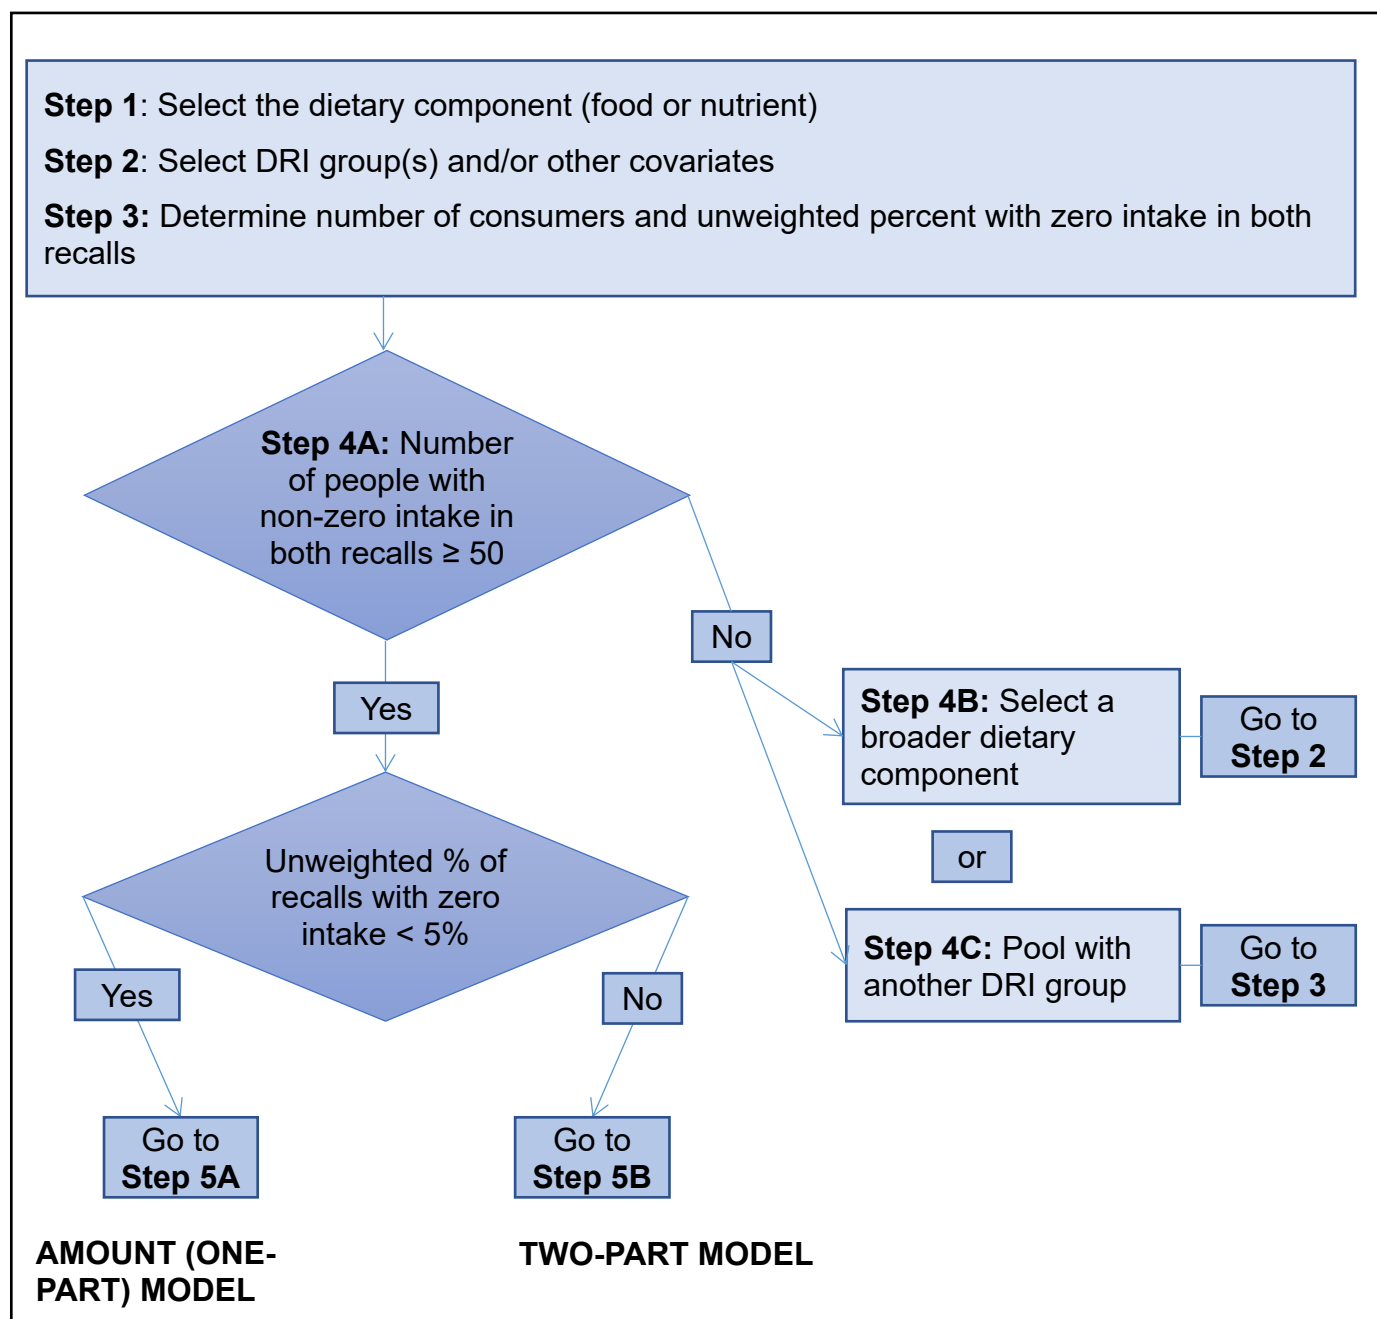

## AMOUNT (ONE-PART) MODEL

**Step 5A:** Run **MIXTRAN** macro with the **AMOUNT** model option to obtain estimates of the model parameters with the root survey weight

Ratio Within-  
Between Variance  
 $\leq 10$

Yes

**Step 6A:** Run **DISTRIB** macro to obtain estimates of mean, percentiles and proportion above or below a cut-off value from the **AMOUNT** model using root survey weight

**Step 6B:** Identify and remove outliers:  
(See below for details of Outliers  
Detection Methods)

Number of people  
with non-zero  
intake in both  
recalls  $\geq 50$

Yes

Go to  
**Step 5A**

No

Go to  
**Step 4B**  
Or  
**Step 4C**

**Step 7A:** Using the bootstrap weights, run **MIXTRAN** and **DISTRIB** macro for the **AMOUNT** model

**Optional:**

1- Use the estimates of the model parameters from the first run of **MIXTRAN** macro as starting values for bootstrap runs.

2- Use the  $\lambda$  from the first run of **MIXTRAN** macro in the bootstrap runs.

**Step 8A:** Estimate standard error of desired parameters (e.g. mean, percentiles, proportion above or below a cut-off value) using the bootstrap runs

END

## TWO PART MODEL

**Step 5B:** Run **MIXTRAN** macro with **CORR** model option to obtain estimates of the model parameters with the root survey weight

**Note:** **NOCORR** model will also be automatically run by **MIXTRAN**

**Step 6B:** Identify and remove outliers:  
(see below for details of Outliers Detection Methods)

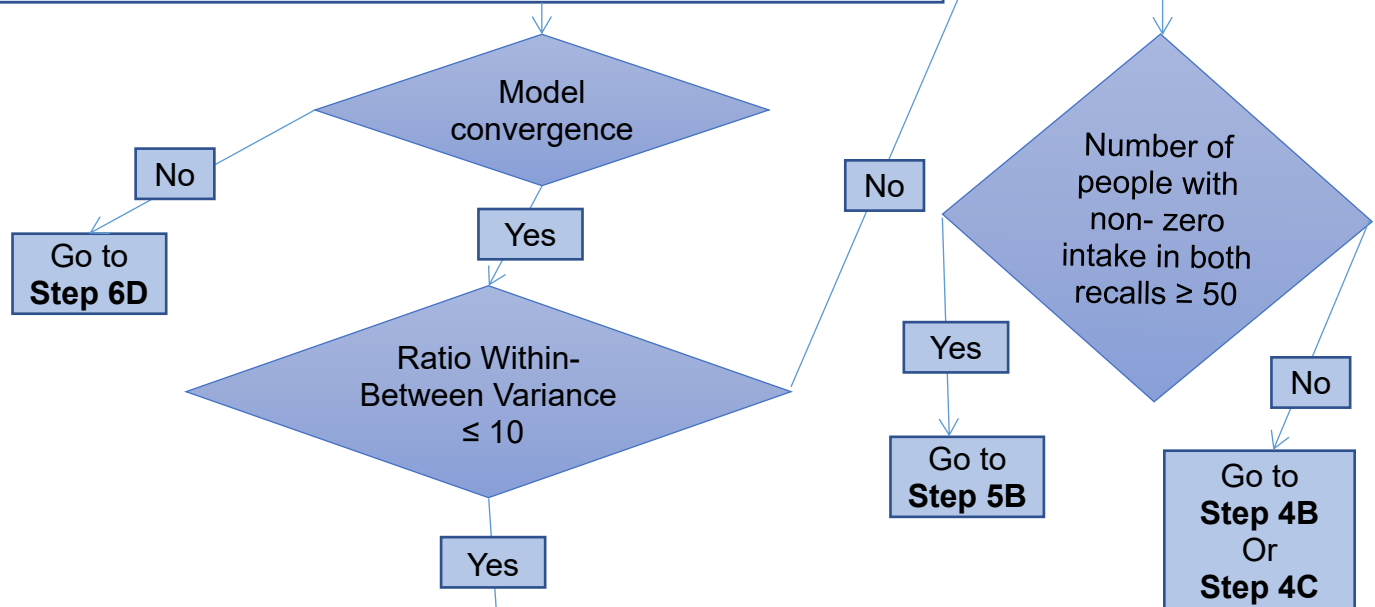

**Step 6C:** Test for correlation: run **MIXTRAN** with the **CORR** model using at least the first 50 bootstrap weights.

**Note:**

Use the  $\lambda$  from **Step 5B** in the bootstrap runs to ensure testing from a similar model

**Optional:**

Use the estimates of the model parameters corresponding to **CORR** model from **Step 5B** as starting values for bootstrap runs.

**Step 7C:** Estimate the Fisher's transformation of the correlation coefficient parameter ( $\rho$ ) and its standard error from **Step 6C** to test the significance of the correlation coefficient between the probability of consumption and the amount consumed

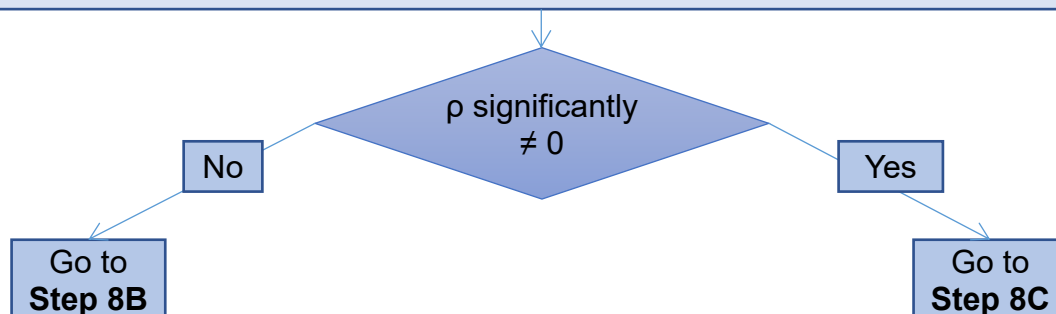

**UNCORRELATED MODEL**

**CORRELATED MODEL**

**Step 6D:** Run **MIXTRAN** macro with **NOCORR** model option to obtain estimates of the model parameters with the root survey weight

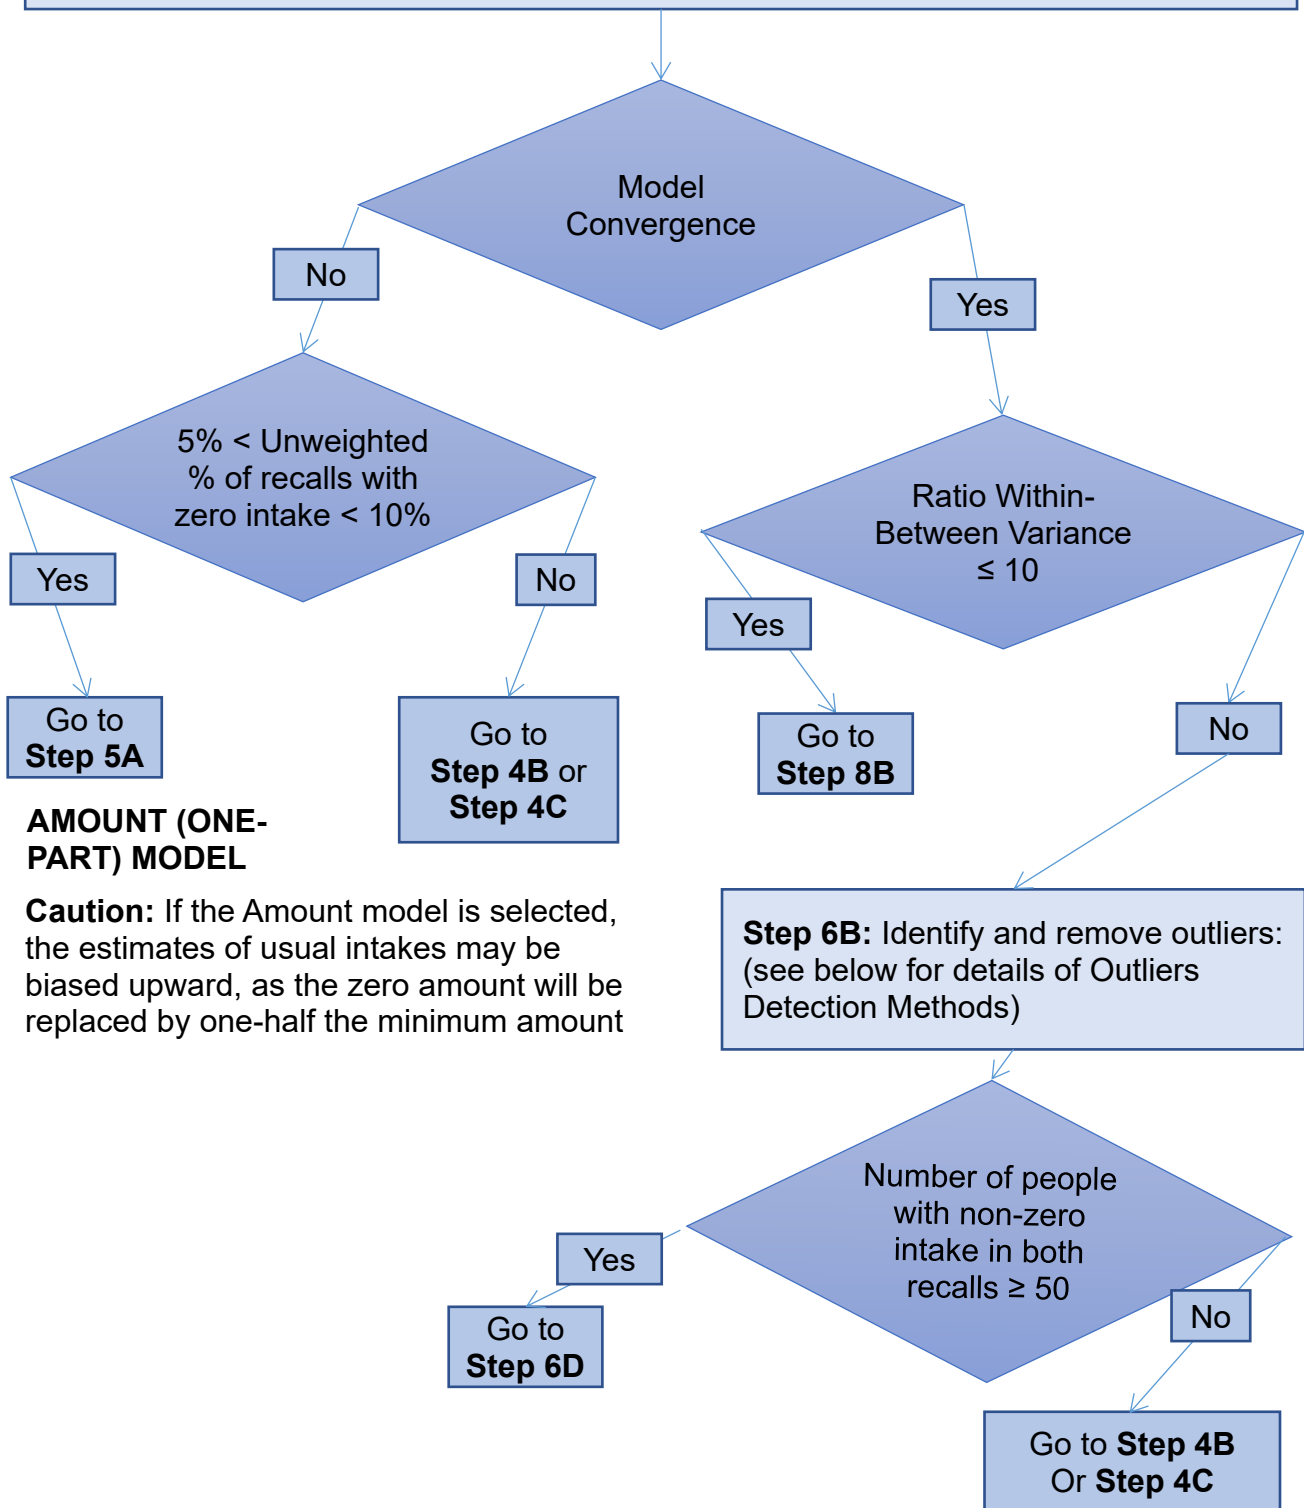

## UNCORRELATED MODEL

**Step 8B:** Using parameter estimates from MIXTRAN corresponding to the NOCORR model option, obtained either as part of the **Step 5B** or from **Step 6D**, run DISTRIB macro to obtain estimates of mean and percentiles with the NOCORR option in the MODELTYPE parameter using the root survey weight.

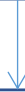

**Step 9B:** Run MIXTRAN and DISTRIB macros with the NOCORR model option using bootstrap weights (analysis of **Step 6C** may need to be re-run)

**Optional:**

- 1- Use the estimates of the model parameters from the MIXTRAN macro, obtained either as part of the **Step 5B** or from **Step 6D**, as starting values for bootstrap runs.
- 2- Use the  $\lambda$  from the first run of MIXTRAN macro in the bootstrap runs.

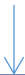

**Step 10B:** Estimate standard error of desired parameters (e.g. mean, percentiles, proportion above or below a cut-off value) using the bootstrap runs

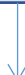

END

## CORRELATED MODEL

**Step 8C:** Using parameter estimates from MIXTRAN corresponding to the CORR model option, obtained from **Step 5B**, run DISTRIB macro to obtain estimates of mean and percentiles with the CORR model option using root survey weight

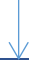

**Step 9C:** Run MIXTRAN macro with the CORR model option with remaining bootstrap weights from **Step 6C**.

**Note:**

Use the  $\lambda$  from **Step 5B** in the bootstrap runs to be consistent with **Step 6C**

**Optional:**

Use the estimates of the model parameters corresponding to CORR model from **Step 5B** as starting values for bootstrap runs.

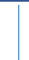

**Step 10C:** Run DISTRIB macro with the CORR model option for all the bootstraps considered in **Step 6C** and **Step 9C**.

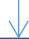

**Step 11:** Estimate standard error of desired parameters (e.g. mean, percentiles, proportion above or below a cut-off value) using the bootstrap runs.

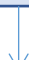

**END**

---

## **For Step 6B: Methods for Outlier Detection used in Analysis of Nutrients and Episodically Consumed Foods**

### **Method I: Large Within-Between Variance Components**

- When the ratio of within/between variation is greater than 10, consider the mean distribution of the difference between Day 1 and Day 2 recalls.
- Values were identified as possible outliers if they fell  $\pm 3$ ,  $\pm 2.5$  or  $\pm 2$  SD away from the mean distribution of difference between Day 1 and Day 2 values
- Day 2 recalls were removed as Day 1 recalls are considered to be less biased
- The scenario which first resulted in the within-between variance ratio less than 10 and excluded the fewest second 24hr recalls was retained

### **Method II: Normality Violation (Krebs-Smith [2])**

- Perform a Box-Cox transformation of the raw non-zero values to approximate normality
- Extreme values identified as points either below the 25th percentile minus  $2.5 \times \text{IQR}$  of the transformed distribution OR above the 75th percentile plus  $2.5 \times \text{IQR}$  of the transformed distribution
- Analysis with and without extreme values conducted and compared
